# Supplementary material
Source: publisher site journal article supplement (https://www.dovepress.com/article/273527)

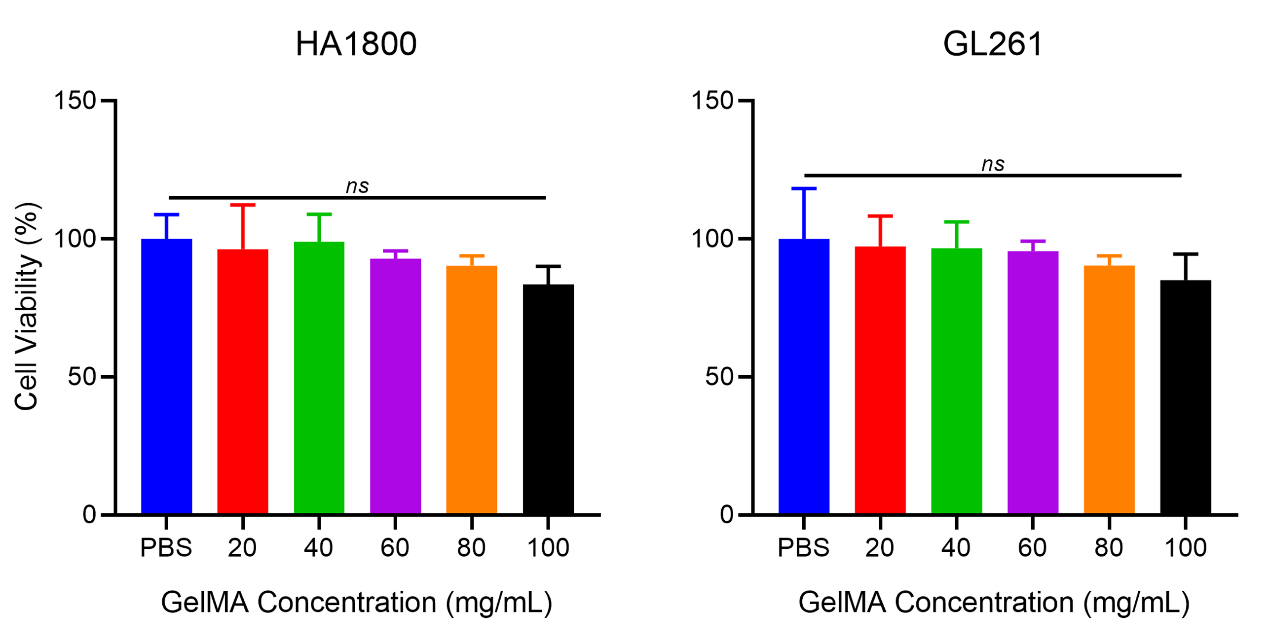
Fig S1. Toxicity detection of different concentration of GelMA on GL261 and HA1800 cell lines.

Supplement: Supplementary file 1 [file get_supplementary_file.php]
